# Supplementary material for: Intrauterine Infusion of Leukocyte-Poor Platelet-Rich Plasma Is an Effective Therapeutic Protocol for Patients with Recurrent Implantation Failure: A Retrospective Cohort Study
Source: MDPI journal article supplement (doi:10.3390/jcm12082823), 2023-04-12
Supplement: s1 [file s1]

**Table S1. Side-effects in PRP group.**

|           | <b>PRP group (n=64)</b> |
|-----------|-------------------------|
| Bleeding  | 0 (0%)                  |
| Pain      | 0 (0%)                  |
| Emesis    | 0 (0%)                  |
| Infection | 0 (0%)                  |

**Table S2.** Logistic regression analysis to evaluate the effect of variables including platelet-rich plasma treatment on clinical pregnancy rate in blastocyst-stage embryo group.

| <b>Univariate analysis</b>                  |                   |                |                |
|---------------------------------------------|-------------------|----------------|----------------|
| <b>Variables</b>                            | <b>Odds ratio</b> | <b>95% CI</b>  | <b>P-value</b> |
| Age (years)                                 | 0.947             | (0.834-1.060)  | 0.312          |
| BMI (kg/m <sup>2</sup> )                    | 1.015             | (0.872-1.181)  | 0.849          |
| AMH (ng/mL)                                 | 1.104             | (0.954-1.279)  | 0.184          |
| Basal FSH(U/L)                              | 0.764             | (0.601-0.970)  | 0.027*         |
| Basal LH (mIU/mL)                           | 1.038             | (0.916-1.177)  | 0.557          |
| Basal E2 (pg/mL)                            | 1.004             | (0.996-1.012)  | 0.326          |
| Basal progesterone (ng/mL)                  | 0.815             | (0.310-1.382)  | 0.849          |
| Duration of infertility (years)             | 1.044             | (0.812-1.344)  | 0.736          |
| Previous ET attempts                        | 0.968             | (0.644-1.455)  | 0.877          |
| No. of blastocysts transferred              | 0.898             | (0.321-2.513)  | 0.838          |
| Endometrial thickness during FET cycle (mm) | 0.908             | (0.712-1.153)  | 0.116          |
| PRP group                                   | 2.940             | (1.075-8.045)  | 0.036*         |
| <b>Multivariate analysis</b>                |                   |                |                |
| <b>Variables</b>                            | <b>Odds ratio</b> | <b>95% CI</b>  | <b>P-value</b> |
| Age (years)                                 | 0.947             | (0.811-1.107)  | 0.496          |
| BMI (kg/m <sup>2</sup> )                    | 1.008             | (0.835-1.218)  | 0.933          |
| AMH (ng/mL)                                 | 1.098             | (0.932-1.293)  | 0.264          |
| Basal FSH (U/L)                             | 0.800             | (0.578-1.106)  | 0.177          |
| Basal LH (mIU/mL)                           | 1.061             | (0.908-1.239)  | 0.456          |
| Basal E2 (pg/mL)                            | 1.044             | (0.993-1.015)  | 0.458          |
| Basal progesterone (ng/mL)                  | 0.918             | (0.107-1.732)  | 0.974          |
| Duration of infertility (years)             | 1.025             | (0.765-1.374)  | 0.867          |
| Previous ET attempts                        | 0.979             | (0.564-1.701)  | 0.941          |
| No. of blastocysts transferred              | 1.076             | (0.284-4.078)  | 0.915          |
| Endometrial thickness during FET cycle (mm) | 0.978             | (0.764-1.172)  | 0.228          |
| PRP group                                   | 4.141             | (1.014-16.917) | 0.048*         |

BMI: body mass index, AMH: antimullerian hormone, FSH: follicle-stimulating hormone, LH: luteinizing hormone, E2: estradiol, ET: embryo transfer, FET: frozen embryo transfer,  $\beta$ -hCG+: beta hCG positive, PRP: platelet-rich plasma. \*Statistically significant at P<0.05.
